# Supplementary material for: Self-Powered Acceleration Sensor Based on Multilayer Suspension Structure and TPU-RTV Film for Vibration Monitoring
Source: MDPI journal article supplement (doi:10.3390/nano11102763), 2021-10-18
Supplement: s1 [file s1]

# Self-Powered Acceleration Sensor Based on Multilayer Suspension Structure and TPU-RTV Film for Vibration Monitoring

Xiaotao Han, Qiyuan Zhang, Junbin Yu, Jinsha Song, Zhengyang Li, Haoran Cui, Jian He, Xiujian Chou and Jiliang Mu \*

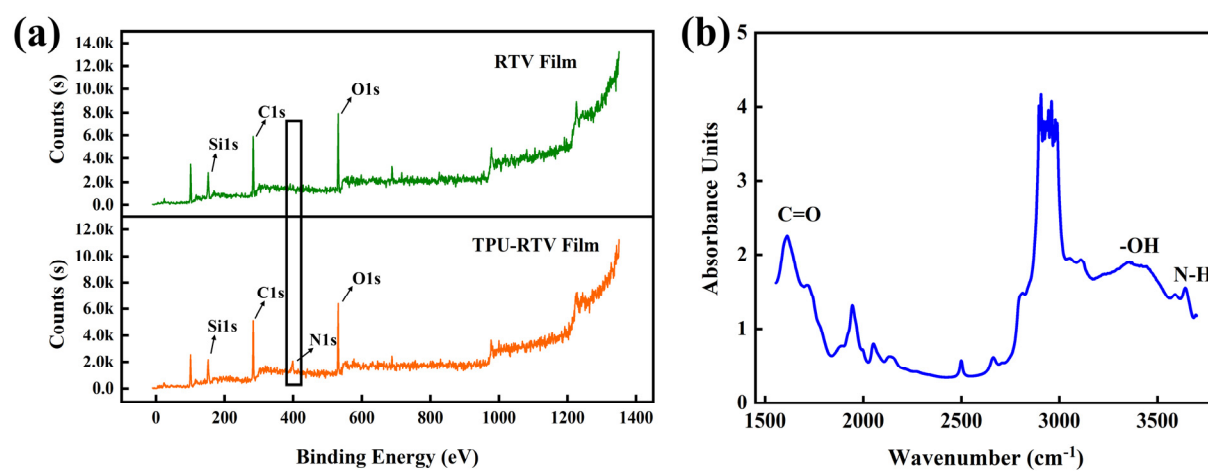

**Figure S1.** (a) Material properties of the films tested by XPS. (b) Material properties of doped films tested by FT-IR.

**Table S1.** Comparison of vibration energy harvesting and self-powered sensors

| Sensitivity<br>(V/(m/s <sup>2</sup> )) | Linearity | Range (m/s <sup>2</sup> ) | Output voltage (V) | References |
|----------------------------------------|-----------|---------------------------|--------------------|------------|
| N.A.                                   | N.A.      | 1.07 ~ 1.25               | 3.1                | [1]        |
| 143.2                                  | N.A.      | 0.5 ~ 5                   | 245                | [2]        |
| 17.64                                  | 0.99      | 0 ~ 1.76×10 <sup>5</sup>  | 35                 | [3]        |
| 0.26                                   | N.A.      | 0 ~ 60                    | 15.5               | [4]        |
| 0.29                                   | N.A.      | 13 ~ 40                   | 20                 | [5]        |
| 1.53                                   | N.A.      | 1 ~ 15                    | 16                 | [6]        |
| 1.33                                   | N.A.      | 0 ~ 6                     | 0.01               | [7]        |
| N.A.                                   | N.A.      | N.A.                      | 316                | [8]        |
| N.A.                                   | N.A.      | N.A.                      | 1                  | [9]        |
| N.A.                                   | N.A.      | N.A.                      | 150                | [10]       |
| N.A.                                   | N.A.      | N.A.                      | 8.2                | [11]       |
| N.A.                                   | 0.99      | N.A.                      | 0.4                | [12]       |
| 23.08                                  | 0.98      | 1 ~ 15                    | 250                | This work  |

1. Zhao, X.; Wei, G.; Li, X.; Qin, Y.; Xu, D.; Tang, W.; Yin, H.; Wei, X.; Jia, L., Self-powered triboelectric nano vibration accelerometer based wireless sensor system for railway state health monitoring. *Nano Energy* **2017**,

34, 549-555. [[CrossRef](#)]

2. Quan, T.; Wang, Z. L.; Yang, Y., A Shared-Electrode-Based Hybridized Electromagnetic-Triboelectric Nanogenerator. *ACS Appl Mater Interfaces* 2016, 8 (30), 19573-19578. [[CrossRef](#)]
3. Dai, K.; Wang, X.; Yi, F.; Jiang, C.; Li, R.; You, Z., Triboelectric nanogenerators as self-powered acceleration sensor under high-g impact. *Nano Energy* 2018, 45, 84-93. [[CrossRef](#)]
4. Zhang, B.; Zhang, L.; Deng, W.; Jin, L.; Chun, F.; Pan, H.; Gu, B.; Zhang, H.; Lv, Z.; Yang, W.; Wang, Z. L., Self-Powered Acceleration Sensor Based on Liquid Metal Triboelectric Nanogenerator for Vibration Monitoring. *ACS Nano* 2017, 11 (7), 7440-7446. [[CrossRef](#)]
5. Pang, Y. K.; Li, X. H.; Chen, M. X.; Han, C. B.; Zhang, C.; Wang, Z. L., Triboelectric Nanogenerators as a Self-Powered 3D Acceleration Sensor. *ACS Appl Mater Interfaces* 2015, 7 (34), 19076-19082. [[CrossRef](#)]
6. Wang, L.; He, T.; Zhang, Z.; Zhao, L.; Lee, C.; Luo, G.; Mao, Q.; Yang, P.; Lin, Q.; Li, X.; Maeda, R.; Jiang, Z., Self-sustained autonomous wireless sensing based on a hybridized TENG and PEG vibration mechanism. *Nano Energy* 2021, 80, 105555. [[CrossRef](#)]
7. Xiang, C.; Liu, C.; Hao, C.; Wang, Z.; Che, L.; Zhou, X., A self-powered acceleration sensor with flexible materials based on triboelectric effect. *Nano Energy* 2017, 31, 469-477. [[CrossRef](#)]
8. Qian, J.; Kim, D.; Lee, D., On-vehicle triboelectric nanogenerator enabled self-powered sensor for tire pressure monitoring. *Nano Energy* 2018, 49, 126-136. [[CrossRef](#)]
8. Askari, H.; Saadatnia, Z.; Khajepour, A.; Khamesee, M.; Zu, J., A Triboelectric Self-Powered Sensor for Tire Condition Monitoring: Concept, Design, Fabrication, and Experiments. *Advanced Engineering Materials* 2017, 19, 1700318. [[CrossRef](#)]
10. Wu, W.; Cao, X.; Zou, J.; Ma, Y.; Wu, X.; Sun, C.; Li, M.; Wang, N.; Wang, Z.; Zhang, L., Triboelectric Nanogenerator Boosts Smart Green Tires. *Advanced Functional Materials* 2018, 29, 1806331. [[CrossRef](#)]
11. Wang, X.; Niu, S.; Yi, F.; Yin, Y.; Hao, C.; Dai, K.; Zhang, Y.; You, Z.; Wang, Z. L., Harvesting Ambient Vibration Energy over a Wide Frequency Range for Self-Powered Electronics. *ACS Nano* 2017, 11, 1728-1735. [[CrossRef](#)]
12. Maharjan, P.; Bhatta, T.; Cho, H.; Hui, X.; Park, C.; Yoon, S.; Salauddin, M.; Rahman, M.; Rana, S.; Park, J., A Fully Functional Universal Self - Chargeable Power Module for Portable/Wearable Electronics and Self - Powered IoT Applications *Advanced Energy Materials* 2020 ,10, 2002782 [[CrossRef](#)]

**Video S1.** Real-time monitoring of a shaker by the MSSAS.

**Video S2.** The MSSAS powers a small calculator.
